RESEARCH ARTICLE

# Effect of Fasting Blood Glucose Level on Heart Rate Variability of Healthy Young Adults

Mohamed Faisal Lutfi\*, Ramaze Farouke Elhakeem

Department of Physiology, Faculty of Medicine and Health Sciences, Al-Neelain University, Khartoum, Sudan

\* [mohamedfaisallutfi@gmail.com](mailto:mohamedfaisallutfi@gmail.com)

## Abstract

### Background

Previous studies reported increased risk of cardiac events in subjects with fasting blood glucose (FBG) levels lower than the diagnostic threshold of diabetes mellitus. However, whether increased cardiac events in those with upper normal FBG is secondary to the shift of their cardiac sympathovagal balance towards sympathetic predominance is unknown.

### Aims

To assess the association between FBG levels and cardiac autonomic modulation (CAM) in euglycaemic healthy subjects based on heart rate variability (HRV) derived indices.

### Subjects and Methods

The study enrolled 42 healthy young adults. Following sociodemographic and clinical assessment, blood samples were collected to measure FBG levels. Five minutes ECG recordings were performed to all participants to obtain frequency domain HRV measurements, namely the natural logarithm (Ln) of total power (LnTP), very low frequency (LnVLF), low frequency (LnLF) and high frequency (LnHF), low frequency/ high frequency ratio (LnLF/HF), normalized low frequency (LF Norm) and high frequency (HF Norm).

### Results

FBG levels correlated positively with LnHF ( $r = 0.33$ ,  $P = 0.031$ ) and HF Norm ( $r = 0.35$ ,  $P = 0.025$ ) and negatively with LF Norm ( $r = -0.35$ ,  $P = 0.025$ ) and LnLF/HF ( $r = -0.33$ ,  $P = 0.035$ ). LnHF and HF Norm were significantly decreased in subjects with the lower (4.00 (1.34)  $\text{ms}^2/\text{Hz}$  and 33.12 (11.94) n.u) compared to those with the upper FBG quartile (5.64 (1.63)  $\text{ms}^2/\text{Hz}$  and 49.43 (17.73) n.u,  $P = 0.013$  and 0.032 respectively). LF Norm and LnLF/HF were significantly increased in subjects with the lower (66.88 (11.94) n.u and 0.73 (0.53)) compared to those with the higher FBG quartile (50.58 (17.83) n.u and 0.03 (0.79),  $P = 0.032$  and 0.038 respectively).

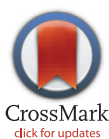

## OPEN ACCESS

**Citation:** Lutfi MF, Elhakeem RF (2016) Effect of Fasting Blood Glucose Level on Heart Rate Variability of Healthy Young Adults. PLoS ONE 11(7): e0159820. doi:10.1371/journal.pone.0159820

**Editor:** Stephen L Atkin, Weill Cornell Medical College Qatar, QATAR

**Received:** March 29, 2016

**Accepted:** July 9, 2016

**Published:** July 21, 2016

**Copyright:** © 2016 Lutfi, Elhakeem. This is an open access article distributed under the terms of the [Creative Commons Attribution License](https://creativecommons.org/licenses/by/4.0/), which permits unrestricted use, distribution, and reproduction in any medium, provided the original author and source are credited.

**Data Availability Statement:** All relevant data are within the paper and its Supporting Information file.

**Funding:** The authors received no specific funding for this work.

**Competing Interests:** The authors have declared that no competing interests exist.

## Conclusion

The present study is the first to demonstrate that rise of blood glucose concentration, within physiological range, is associated with higher parasympathetic, but lower sympathetic CAM. Further researches are needed to set out the glycemic threshold beyond which further increase in glucose level readjusts sympathovagal balance towards sympathetic predominance again.

## Introduction

Currently, heart rate variability (HRV) is among the useful tools used to assess modulatory effects of the autonomic nervous system on the heart [1]. From physiological standpoint, the interaction between the sympathetic and parasympathetic discharge to the heart is a major determinant of HRV and consequently cardiac autonomic modulations (CAM) [1–3]. Time and frequency domains analyses are commonly used to evaluate HRV and CAM; however, frequency domain is preferred if HRV measurements are derived from short-term (5-minute) ECG recording [4]. Natural logarithm (Ln) of total power (LnTP), very low frequency (LnVLF), low frequency (LnLF) and high frequency (LnHF), low frequency/ high frequency ratio (LnLF/HF), normalized low frequency (LF Norm) and high frequency (HF Norm) are the main measurements used to express results of frequency domain HRV analysis [4–6]. LnTP truly reflect the overall HRV [4]. LnVLF and LnHF are currently believed to be influenced by parasympathetic regulation; however, there are many concerns about the physiological basis of LnVLF [4, 5]. Although LnLF was previously used as an indicator of sympathetic modulations, recent studies demonstrate it as a parasympathetic index [7, 8]. LF Norm and HF Norm are commonly used to assess modulatory effects of sympathetic and parasympathetic discharge on the heart respectively [6, 9]. LnLF/HF is used as a measure of sympathovagal balance [4]. Noteworthy, mean heart rate (MHR) during the period of ECG recording is inversely related HRV [4, 5] and should be adjusted for if CAM is compared between two groups with different MHR [6, 9].

Most previous studies utilized HRV in risk stratification of cardiac events especially following myocardial infarction [10, 11]. In clinical practice, augmented sympathetic CAM is associated with low HRV and increased the risk of cardiac events among susceptible patients [4, 5]. Recent researches used HRV to estimate the impact of autonomic dysfunction on certain cardiovascular risk factors like hypertension [12], diabetes mellitus [13] and others [1, 4, 5]. Poor HRV and higher sympathetic activity were demonstrated in hypertensive patients [12] and subjects with high normal readings of blood pressures [14]. Similar trends of HRV and CAM were demonstrated in cases with hyperglycemia [13, 15] as well as hypoglycemia [16, 17]. However, whether these trends extend to the normal physiological levels of blood glucose are not clear. There are accumulating evidences that cardiovascular events are higher at fasting [18] or 2-hours [19] glucose levels lower than the diagnostic threshold for diabetes mellitus. A prospective study confirmed that subjects with fasting blood glucose [FBG] levels > 85 mg/dl had significantly increased cardiovascular mortality compared with those with lower levels [18]. This finding raises a question whether increased cardiovascular mortality at the upper limits of normal FBG range is associated with shift of cardiac sympathovagal balance towards sympathetic predominance. For further exploration of this opinion, we presently designed this study to assess the association between FBG levels and CAM in euglycaemic healthy subjects based on HRV-derived indices.

## Materials and Methods

The present study received ethical approval from ethics review committee (ERC), Faculty of Medicine, University of Khartoum, Sudan. All subjects who were willing to participate in the study signed a written informed consent before being examined.

The study enrolled 42 young adults (23 males and 19 females). All volunteers were medical students or staff members at Alneelain University, Khartoum, Sudan. The selection criteria were: interest to participate in the study, age of 20–40 years, absence of chronic diseases including diabetes mellitus, hypertension, thyroid dysfunction, heart diseases or any illness known alter heart rhythm. None of the studied subjects were on regular medication. Sociodemographic characteristics, past medical history and clinical examination were collected guided by a questionnaire. The body mass index (BMI) was estimated by subdividing the weight in kilograms by the height in squared meters. The mean arterial blood pressure (MABP) was calculated by adding the diastolic blood pressure to one third of the difference between the systolic and the diastolic blood pressures. FBG levels were measured in all volunteers, after ensuring an overnight fasting of at least 8 hours, using the calorimetric method (JENWAY 6051 Colorimeter, Bibby Scientific Limited, UK). FBG levels of all studied subjects were below diabetic threshold ( $< 110$  mg/dl).

Using Heart Rhythm Scanner (Version 2.0, Biocom Technologies, Poulsbo, WA, U.S.A), frequency domain HRV indices were measured based on supine, 5-min ECG recording. ECG recordings were conducted in all participants during the period from 09.00 AM–12.00 AM to guard against possible circadian effects on HRV parameters. Clear ECG signals, lack of ECG movement artifacts and easy regular breathing were ensured during ECG recording. Frequency domain HRV measurements, namely LnTP, LnVLF, LnLF, LnHF, LF Norm, HF Norm and LnLF/HF, were used to interpret HRV and CAM among the studied subjects as previously described [1, 4–6, 9]. The Heart Rhythm Scanner also calculated MHR during the period of ECG recording.

Data were entered into the computer via SPSS for Windows (Version 16; Chicago, IL, USA). Studied variables were described with means (M) and standard deviations (SD). Quintiles were used to create cut-off points for FBG levels among the studied subjects. To guard against possible confounding effects of heart rate on indicators of cardiac autonomic modulations [20, 21], comparable distributions MHR were ensured among different quintiles using one way ANOVA and LSD Post Hoc analysis. Associations between FBG levels and frequency domain HRV indices were assessed with bivariate correlations. Student T-test was used to assess the differences in the means of HRV parameters between the upper and lower FBG quintiles as well as between the upper quintile and the mean of the remaining four FBG quintiles. Linear regression analysis was used to assess possible influences of FBG level, gender, age, BMI, MHR and MABP on LnHF, HF Norm, LF Norm and LnLF/HF.  $P < 0.05$  was considered statistically significant.

## Results

The M (SD) of age, BMI, FBG level, MABP, MHR and frequency domain HRV parameters are given in [Table 1](#).

FBG levels correlated positively with LnHF ( $r = 0.33$ ,  $P = 0.031$ ) and HF Norm ( $r = 0.35$ ,  $P = 0.025$ ) and negatively with LF Norm ( $r = -0.35$ ,  $P = 0.025$ ) and LnLF/HF ( $r = -0.33$ ,  $P = 0.035$ ), [Table 2](#).

Quintiles cut-off points for FBG levels were  $< 73.0$  mg/dl, 73.0–89.0 mg/dl, 89.1–95.0 mg/dl, 95.1–98.0 mg/dl and  $> 98.0$  mg/dl. There were no significant differences in the MHR between the studied subjects when grouped according to FBG quintiles ( $F = 1.91$ ,  $P = 0.331$ ). LnHF and HF Norm were significantly decreased in subjects with the lower (4.00 (1.34)  $\text{ms}^2/\text{Hz}$  and 33.12 (11.94) n.u) compared to those with the upper FBG quartile (5.64 (1.63)  $\text{ms}^2/\text{Hz}$  and 49.43 (17.73) n.u,  $P = 0.013$  and 0.032 respectively). In contrast, LF Norm and LnLF/HF were significantly increased in subjects with the lower (66.88 (11.94) n.u and 0.73 (0.53)) compared to those

**Table 1. Characteristics of studied individuals.**

|                             | M (SD)        |
|-----------------------------|---------------|
|                             | <b>N = 42</b> |
| Age (Years)                 | 25.83 (4.83)  |
| BMI (Kg/m <sup>2</sup> )    | 24.34 (5.63)  |
| FBG level (mg/dl)           | 87.21 (9.16)  |
| MABP (mmHg)                 | 90.40 (14.64) |
| MHR (Beat/Minute)           | 81.89 (10.60) |
| LnTP (ms <sup>2</sup> /Hz)  | 6.67 (1.31)   |
| LnVLF (ms <sup>2</sup> /Hz) | 5.51 (1.22)   |
| LnLF (ms <sup>2</sup> /Hz)  | 5.47 (1.36)   |
| LnHF (ms <sup>2</sup> /Hz)  | 5.29 (1.70)   |
| LF Norm (n.u)               | 54.07 (17.93) |
| HF Norm (n.u)               | 45.94 (17.94) |
| LnLF/HF                     | 0.18 (0.79)   |

doi:10.1371/journal.pone.0159820.t001

with the higher FBG quartile (50.58 (17.83) n.u and 0.03 (0.79), P = 0.032 and 0.038 respectively). Similar pattern of changes were noted for LnHF, HF Norm, LF Norm and LnLF/HF when those with the lower FBG quintile were compared with all other studied subjects, [Fig 1](#).

Gradual decrease in LnHF and HF Norm and simultaneous increase in LF Norm and LnLF/HF were noted in the upper two FBG quintiles ([Fig 1](#)); however, Post Hoc analysis failed to document statistical significant for this rise.

Linear regression analysis confirmed that influence of FBG level on LnHF, HF Norm, LF Norm and LnLF/HF is independent of gender, age, BMI, MHR or MABP of the studied subjects, [Table 3](#).

## Discussion

It is apparent from the present results that rise in blood glucose level, within physiological range, is associated augmented parasympathetic CAM, as indicated by higher values of LnHF and HF Norm. This finding is further supported by simultaneous lower readings of LF Norm and LnLF/HF, which point to sympathetic withdrawal at the upper limits of normal glycemic control. Previous researches exploring the effects of blood glucose concentration on HRV were mostly conducted among diabetic patients [[13](#), [15](#), [22](#), [23](#)] or other non-physiological conditions [[24](#), [25](#)], which explain why the present findings are probably the first to be reported. In contrast to our results, previous studies repeatedly demonstrated depressed HRV secondary to sympathetic predominance in cases with hyperglycemia [[13](#), [15](#), [22](#), [23](#)].

A previous study investigated glycemic threshold for impaired autonomic control gave conclusions in favor of the present findings, though it was based on different methodological

**Table 2. Correlations between FBG levels and frequency domain HRV indices.**

|                             | r     | P     |
|-----------------------------|-------|-------|
| LnTP (ms <sup>2</sup> /Hz)  | 0.26  | 0.098 |
| LnVLF (ms <sup>2</sup> /Hz) | 0.18  | 0.265 |
| LnLF (ms <sup>2</sup> /Hz)  | 0.22  | 0.164 |
| LnHF (ms <sup>2</sup> /Hz)  | 0.33  | 0.031 |
| LF Norm (n.u)               | -0.35 | 0.025 |
| HF Norm (n.u)               | 0.35  | 0.025 |
| LnLF/HF                     | -0.33 | 0.035 |

doi:10.1371/journal.pone.0159820.t002

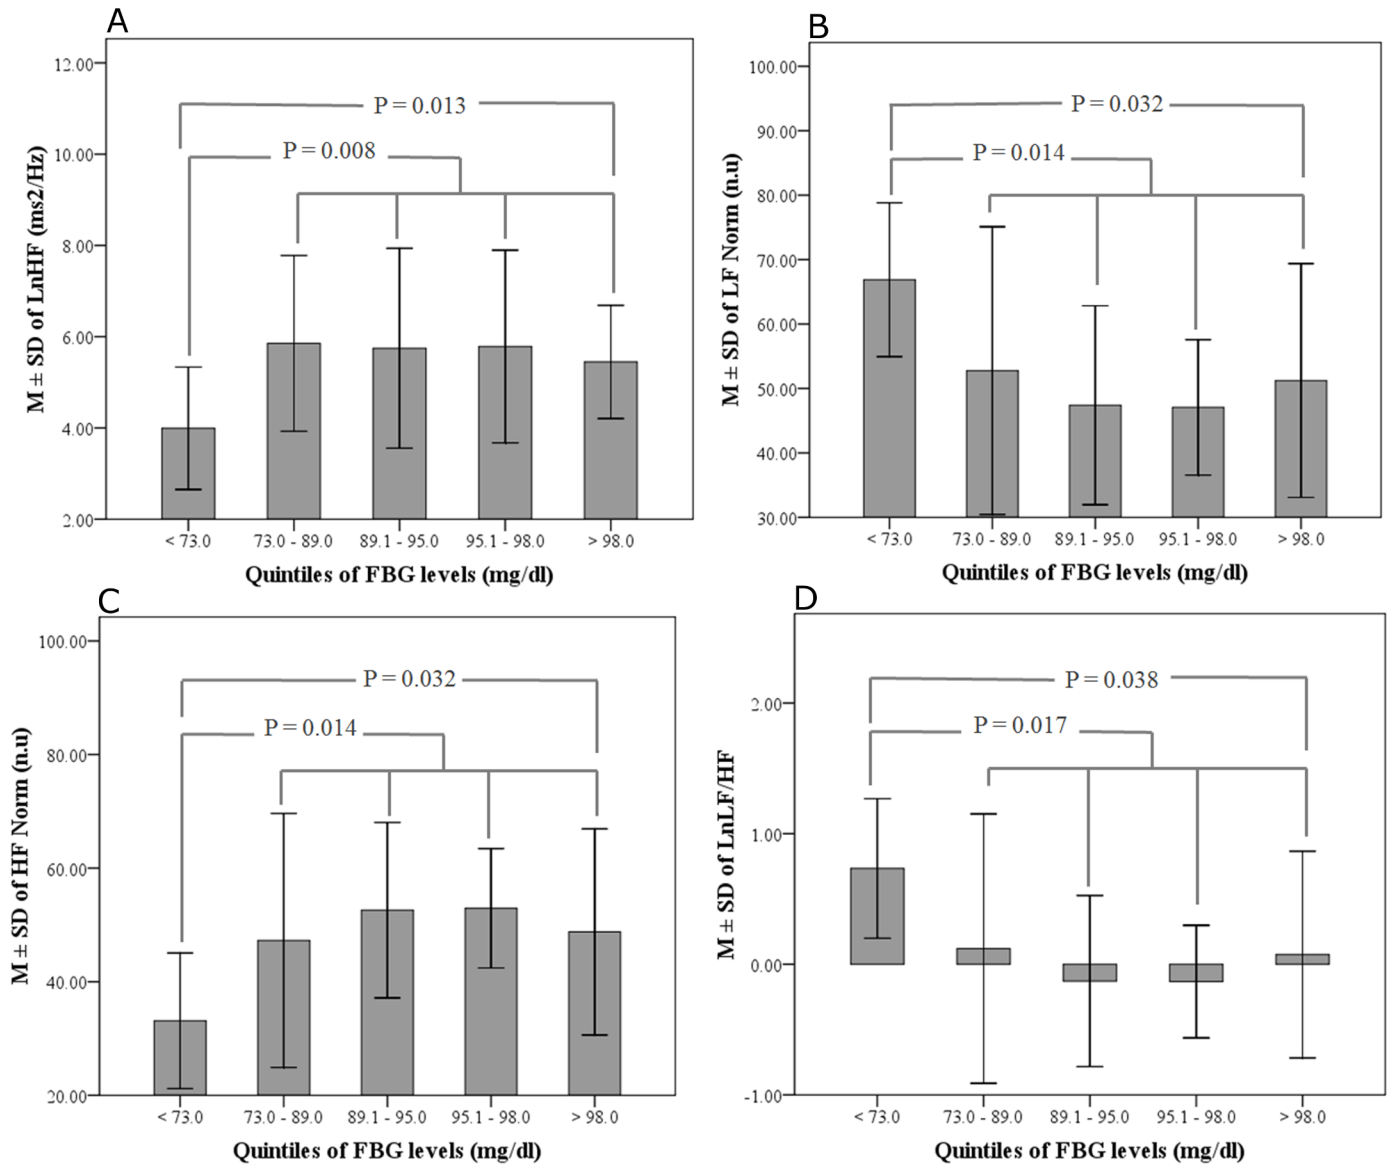

**Fig 1.** M±SD of (A) LnHF, (B) LF Norm, (C) HF Norm and (D) LnLF/HF Norm in subjects grouped according to FBG quintiles. The P values refer to the significant difference of the respective HRV indices when subjects with lower and upper FBG quartiles, or lower and the mean of all other FBG quintiles, were compared using Student T-test.

doi:10.1371/journal.pone.0159820.g001

technique [26]. Based on the results of baroreflex sensitivity, the study concluded that depressed autonomic control associated with high normal levels of glucose are due to aging, obesity and elevated blood pressure but never glucose concentration [26]. In another study, power spectral analysis of HRV during oral glucose tolerance test (OGTT) was investigated in 12 and 15 pregnant women with and without gestational diabetes mellitus (GDM) respectively [24]. Acute rise of blood glucose levels during the OGTT significantly activate sympathetic and depress parasympathetic discharge; however, the autonomic alterations were less marked in women with GDM compared with the controls. The same findings were reproduced when the effect of OGTT on sympathovagal balance was assessed in 30 healthy centenarians and 25 aged subjects [25].

**Table 3. Linear regression analysis of factors associated with LnHF, LF Norm, HF Norm and LnLF/HF.**

|                          | LnHF  |      |       | LF Norm |      |       | HF Norm |      |       | LnLF/HF |      |       |
|--------------------------|-------|------|-------|---------|------|-------|---------|------|-------|---------|------|-------|
|                          | CE    | SE   | P     | CE      | SE   | P     | CE      | SE   | P     | CE      | SE   | P     |
| Gender                   | 0.05  | 0.50 | 0.927 | 10.1    | 5.39 | 0.069 | -10.1   | 5.39 | 0.069 | 0.44    | 0.24 | 0.076 |
| Age (Years)              | -0.02 | 0.05 | 0.647 | 0.02    | 0.57 | 0.971 | -0.02   | 0.57 | 0.969 | 0.00    | 0.03 | 0.954 |
| BMI (Kg/m <sup>2</sup> ) | -0.06 | 0.05 | 0.209 | 0.36    | 0.52 | 0.497 | -0.36   | 0.52 | 0.499 | 0.01    | 0.02 | 0.601 |
| MHR (Beat/Minute)        | -0.02 | 0.02 | 0.507 | -0.11   | 0.26 | 0.675 | 0.11    | 0.26 | 0.675 | 0.00    | 0.01 | 0.706 |
| MABP (mmHg)              | -0.05 | 0.03 | 0.116 | 0.48    | 0.31 | 0.134 | -0.48   | 0.31 | 0.133 | 0.02    | 0.01 | 0.086 |
| FBG level (mg/dl)        | 0.04  | 0.02 | 0.024 | -0.56   | 0.19 | 0.006 | 0.56    | 0.19 | 0.006 | -0.02   | 0.01 | 0.008 |

CE coefficient, SE standard error

doi:10.1371/journal.pone.0159820.t003

A retrospective cohort investigating youth with insulin dependent diabetes mellitus showed that for every 1% increase in hemoglobin A1C over 6 years, there was a 5% reduction in the SD of the normal RR interval [22]. In addition, there was progressive decrease in HF Norm and increase in LF Norm independent of demographic, anthropometric, and cardiovascular risk factors [23]. In cases of hyperglycemia, glucose level can directly or indirectly, by inducing insulin release, influence cardiac autonomic modulations [13, 26]. The results of Bellavere et al showed attenuated HF bands and higher LF/HF ratio following insulin infusion in euglycaemic clamp model, suggesting negative feedback of insulin on parasympathetic discharge to the heart [27]. This implication was confirmed by Borne et al, who showed significant accentuation in muscle sympathetic nerve activities occurring simultaneously with euglycaemic hyperinsulinemic glucose clamp [15]. Similar results were obtained when cardiac autonomic modulations were evaluated in 18 diabetic patients and 8 age-matched healthy controls during hyperinsulinemic-hypoglycemic clamp [16]. Hypoglycemia was associated with higher MHR, but lower HF band, in the diabetic patients as well as the controls. According to another report, vagal withdrawal and augmented sympathetic activities are common during periods of hypoglycemia regardless of insulin level [17]. It is apparent from the above-mentioned reports that pattern of change in CAM during hypo- and hyperglycemia is comparable, being towards sympathetic predominance in the two extremes of glucose levels. According to the present results, sympathetic modulation, as indicated by LnLF/HF, was maximum in the lower FBG quintile and decreased gradually thereafter. The results also demonstrated gradual decrease in LnHF and HF Norm concurrently with the increase in LF Norm and LnLF/HF in the upper two FBG quintiles; however, Post Hoc analysis failed to document statistical significant for this rise. Accordingly, the enhanced sympathetic discharge associated with hypoglycemia seems to extend to the lower range of normal FBG, but decrease gradually and replaced by enhanced parasympathetic modulations at higher levels of normal FBG. Further researches are needed to set out the glycemic threshold beyond which further increase in glucose level readjusts sympathovagal balance towards sympathetic predominance again.

Limitations of this study include lack of insulin measurements among the young adults we studied. Combined evaluation of fasting insulin and glucose concentrations is likely to offer better background on insulin resistance among the studied subjects [28], and will clarify whether insulin or glucose level has more impact on cardiac autonomic modulations [15, 27]. Moreover, extending the FBG levels we studied to the diabetic range could have offer better chance for detection of the glycemic threshold beyond which higher glucose level is associated with sympathetic predominance. Larger sample size and adjustment for potential confounding factors like dietary habits and family history of heart problems should also be considered in future studies.



## Conclusion

The present study is the first to demonstrate that rise of blood glucose concentration, within physiological range, is associated with higher parasympathetic, but lower sympathetic CAM. Combining results of previous reports and the present, the enhanced sympathetic discharge associated with hypoglycemia seems to extend to the lower range of normal FBG, but decrease gradually and replaced by enhanced parasympathetic modulations at higher normal level of FBG. Further researches are needed to set out the glycemic threshold beyond which further increase in glucose level readjusts sympathovagal balance towards sympathetic predominance again.

## Supporting Information

### S1 Raw data.

(DOCX)

## Author Contributions

Conceived and designed the experiments: MFL. Performed the experiments: MFL. Analyzed the data: MFL. Contributed reagents/materials/analysis tools: RFE MFL. Wrote the paper: MFL RFE.

## References

1. Billman GE, Huikuri HV, Sacha J, Trimmel K. An introduction to heart rate variability: methodological considerations and clinical applications. *Frontiers in Physiology*. 2015; 6:55. doi: [10.3389/fphys.2015.00055](https://doi.org/10.3389/fphys.2015.00055) PMID: [25762937](https://pubmed.ncbi.nlm.nih.gov/25762937/)
2. Gašior JS, Sacha J, Jeleń PJ, Pawłowski M, Werner B, Dąbrowski MJ. Interaction Between Heart Rate Variability and Heart Rate in Pediatric Population. *Frontiers in Physiology*. 2015; 6:385. doi: [10.3389/fphys.2015.00385](https://doi.org/10.3389/fphys.2015.00385) PMID: [26733878](https://pubmed.ncbi.nlm.nih.gov/26733878/)
3. Freeman R, Chapleau MW. Testing the autonomic nervous system. *Handb Clin Neurol*. 2013; 115:115–36. doi: [10.1016/B978-0-444-52902-2.00007-2](https://doi.org/10.1016/B978-0-444-52902-2.00007-2) PMID: [23931777](https://pubmed.ncbi.nlm.nih.gov/23931777/)
4. Lutfi MF. Review article: Heart rate variability. *Sud JMS*. 2011; 6:43–50.
5. Task Force of the European Society of Cardiology and the North American Society of Pacing and Electrophysiology. Heart rate variability standards of measurement, physiological interpretation and clinical use. *Circulation*. 1996; 93:65–1043.
6. Lutfi MF. Patterns of heart rate variability and cardiac autonomic modulations in controlled and uncontrolled asthmatic patients. *BMC Pulmonary Medicine*. 2015; 15:119. doi: [10.1186/s12890-015-0118-8](https://doi.org/10.1186/s12890-015-0118-8) PMID: [26459382](https://pubmed.ncbi.nlm.nih.gov/26459382/)
7. Reyes del Paso GA, Langewitz W, Mulder LJ, van Roon A, Duschek S. The utility of low frequency heart rate variability as an index of sympathetic cardiac tone: a review with emphasis on a reanalysis of previous studies. *Psychophysiology*. 2013; 50(5):477–87. doi: [10.1111/psyp.12027](https://doi.org/10.1111/psyp.12027) PMID: [23445494](https://pubmed.ncbi.nlm.nih.gov/23445494/)
8. Goldstein DS, Benth O, Park MY, Sharabi Y. Low-frequency power of heart rate variability is not a measure of cardiac sympathetic tone but may be a measure of modulation of cardiac autonomic outflows by baroreflexes. *Exp Physiol*. 2011; 96(12):1255–61. doi: [10.1113/expphysiol.2010.056259](https://doi.org/10.1113/expphysiol.2010.056259) PMID: [21890520](https://pubmed.ncbi.nlm.nih.gov/21890520/)
9. Lutfi MF. Autonomic modulations in patients with bronchial asthma based on short-term heart rate variability. *Lung India*. 2012; 29(3):254–8. doi: [10.4103/0970-2113.99111](https://doi.org/10.4103/0970-2113.99111) PMID: [22919165](https://pubmed.ncbi.nlm.nih.gov/22919165/)
10. Harris PR, Sommargren CE, Stein PK, Fung GL, Drew BJ. Heart rate variability measurement and clinical depression in acute coronary syndrome patients: narrative review of recent literature. *Neuropsychiatr Dis Treat*. 2014; 10:1335–47. doi: [10.2147/NDT.S57523](https://doi.org/10.2147/NDT.S57523) PMID: [25071372](https://pubmed.ncbi.nlm.nih.gov/25071372/)
11. Kotecha D, New G, Flather MD, Eccleston D, Pepper J, Krum H. Five-minute heart rate variability can predict obstructive angiographic coronary disease. *Heart*. 2012 Mar; 98(5):395–401. doi: [10.1136/heartjnl-2011-300033](https://doi.org/10.1136/heartjnl-2011-300033) PMID: [22121069](https://pubmed.ncbi.nlm.nih.gov/22121069/)
12. Tadic M, Cuspidi C, Pencic B, Jozika L, Celic V. Relationship between right ventricular remodeling and heart rate variability in arterial hypertension. *J Hypertens*. 2015 May; 33(5):1090–7. doi: [10.1097/HJH.0000000000000511](https://doi.org/10.1097/HJH.0000000000000511) PMID: [25668353](https://pubmed.ncbi.nlm.nih.gov/25668353/)

13. Straznicky NE, Lambert GW, Masuo K, Dawood T, Eikelis N, Nestel PJ, McGrane MT, et al. Blunted sympathetic neural response to oral glucose in obese subjects with the insulin-resistant metabolic syndrome. *Am J Clin Nutr.* 2009 Jan; 89(1):27–36. doi: [10.3945/ajcn.2008.26299](https://doi.org/10.3945/ajcn.2008.26299) PMID: [19056585](https://pubmed.ncbi.nlm.nih.gov/19056585/)
14. Lutfi MF, Sukkar M Y. Effect of blood pressure on heart rate variability. *Khartoum Med J.* 2011; 4(1):548–553.
15. Borne P, Hausberg M, Hoffman R, Mark Allyn, Erling A. Hyperinsulinemia produces cardiac vagal withdrawal and nonuniform sympathetic activation in normal subjects. *Am J Physiol Regul Integr Comp Physiol.* 1999; 276: R178–R183.
16. Koivikko ML, Salmela PI, Airaksinen KE, Tapanainen JS, Ruokonen A, Mäkikallio TH, et al. Effects of sustained insulin-induced hypoglycemia on cardiovascular autonomic regulation in type 1 diabetes. *Diabetes.* 2005 Mar; 54(3):744–50. PMID: [15734851](https://pubmed.ncbi.nlm.nih.gov/15734851/)
17. Chopra S, Kewal A. Does hypoglycemia cause cardiovascular events? *Indian Journal of Endocrinology and Metabolism.* 2012; 16(1):102–104.]. doi: [10.4103/2230-8210.91203](https://doi.org/10.4103/2230-8210.91203) PMID: [22276259](https://pubmed.ncbi.nlm.nih.gov/22276259/)
18. Bjørnholt JV, Erikssen G, Aaser E, Sandvik L, Nitter-Hauge S, Jervell J, Erikssen J, et al. Fasting blood glucose: an underestimated risk factor for cardiovascular death. Results from a 22-year follow-up of healthy nondiabetic men. *Diabetes Care.* 1999 Jan; 22(1):45–9. PMID: [10333902](https://pubmed.ncbi.nlm.nih.gov/10333902/)
19. Balkau B, Shipley M, Jarrett RJ, Pyörälä K, Pyörälä M, Forhan A, et al. High blood glucose concentration is a risk factor for mortality in middle-aged nondiabetic men. 20-year follow-up in the Whitehall Study, the Paris Prospective Study, and the Helsinki Policemen Study. *Diabetes Care.* 1998 Mar; 21(3):360–7. PMID: [9540016](https://pubmed.ncbi.nlm.nih.gov/9540016/)
20. Sacha J, Barabach S, Statkiewicz-Barabach G, Sacha K, Müller A, Piskorski J, et al. How to strengthen or weaken the HRV dependence on heart rate—description of the method and its perspectives. *Int J Cardiol.* 2013; 168(2):1660–3. doi: [10.1016/j.ijcard.2013.03.038](https://doi.org/10.1016/j.ijcard.2013.03.038) PMID: [23578892](https://pubmed.ncbi.nlm.nih.gov/23578892/)
21. Sacha J, Pluta W. Alterations of an average heart rate change heart rate variability due to mathematical reasons. *Int J Cardiol* 2008; 128:444–7. PMID: [17689709](https://pubmed.ncbi.nlm.nih.gov/17689709/)
22. Jaiswal M, Fingerlin TE, Urbina EM, Wadwa RP, Talton JW, D'Agostino RB Jr, et al. Impact of Glycemic Control on Heart Rate Variability in Youth with Type 1 Diabetes: The SEARCH CVD Study. *Diabetes Technology & Therapeutics.* 2013; 15(12):977–983. doi: [10.1089/dia.2013.0147](https://doi.org/10.1089/dia.2013.0147)
23. Jaiswal M, Urbina EM, Wadwa RP, Talton JW, D'Agostino RB Jr, Hamman RF, et al. Reduced Heart Rate Variability Among Youth With Type 1 Diabetes: The SEARCH CVD study. *Diabetes Care.* 2013; 36(1):157–162. doi: [10.2337/dc12-0463](https://doi.org/10.2337/dc12-0463) PMID: [22961570](https://pubmed.ncbi.nlm.nih.gov/22961570/)
24. Weissman A, Lowenstein L, Peleg A, Thaler I, Zimmer EZ. Power spectral analysis of heart rate variability during the 100-g oral glucose tolerance test in pregnant women. *Diabetes Care.* 2006 Mar; 29(3):571–4. PMID: [16505508](https://pubmed.ncbi.nlm.nih.gov/16505508/)
25. Paolisso G, Manzella D, Rizzo MR, Barbieri M, Gambardella A, Varricchio M. Effects of glucose ingestion on cardiac autonomic nervous system in healthy centenarians: differences with aged subjects. *Eur J Clin Invest.* 2000 Apr; 30(4):277–84. PMID: [10759874](https://pubmed.ncbi.nlm.nih.gov/10759874/)
26. Watkins LL, Surwit RS, Grossman P, Sherwood A. Is there a glycemic threshold for impaired autonomic control? *Diabetes Care.* 2000 Jun; 23(6):826–30. PMID: [10841004](https://pubmed.ncbi.nlm.nih.gov/10841004/)
27. Bellavere F, Cacciatori V, Moghetti P, Gemma ML, Deller A, Tosi F. et al. Acute effect of insulin on autonomic regulation of the cardiovascular system: a study by heart rate spectral analysis. *Diabet Med.* 1996; 13(8):709–14. PMID: [8862944](https://pubmed.ncbi.nlm.nih.gov/8862944/)
28. Preethi BL, Jaisri G, Kumar KM, Sharma R. Assessment of insulin resistance in normoglycemic young adults. *Fiziol Cheloveka.* 2011 Jan-Feb; 37(1):118–25. PMID: [21466052](https://pubmed.ncbi.nlm.nih.gov/21466052/)
